# Supplementary material for: Syntheses of ferrocene-functionalized indium-based metal–organic frameworks for third order nonlinear optical application
Source: Royal Society of Chemistry journal article supplement (doi:10.1039/d2qi01949c), 2022-11-15
Supplement: d2qi01949c1.pdf [file d2qi01949c1.pdf]

## Supporting Information

### Syntheses of Ferrocene-Functionalized Indium-based Metal-Organic Frameworks for Third Order Nonlinear Optical Application

Rong Zhang<sup>a,b</sup>, Bing Wang<sup>a,b</sup>, Fei Wang<sup>b\*</sup>, Shumei Chen<sup>a\*</sup> and Jian Zhang<sup>b</sup>

<sup>a</sup> College of Chemistry, Fuzhou University, Fuzhou, Fujian 350108, P. R. China. E-mail: csm@fzu.edu.cn.

<sup>b</sup> State Key Laboratory of Structural Chemistry, Fujian Institute of Research on the Structure of Matter, the Chinese Academy of Sciences, Fuzhou, Fujian 350002, P. R. China. E-mail: wangfei04@fjirsm.ac.cn.

## Contents

|                                                       |    |
|-------------------------------------------------------|----|
| Photocurrent measurement .....                        | 2  |
| Cyclic voltammetric measurement .....                 | 2  |
| Single crystal synthesis and characterization .....   | 2  |
| Single crystal structure determination .....          | 2  |
| Infrared spectrum analysis .....                      | 7  |
| <sup>1</sup> H NMR spectra .....                      | 8  |
| Fluorescence .....                                    | 11 |
| Adsorption Characterization .....                     | 12 |
| PXRD analyses .....                                   | 13 |
| TGA curves .....                                      | 14 |
| Calculation of the nonlinear optical parameters ..... | 14 |
| UV-Vis spectra .....                                  | 15 |
| Cyclic voltammetric curves .....                      | 18 |
| Cyclic voltammetric curves .....                      | 18 |
| References .....                                      | 18 |

## Photocurrent measurement

We prepared the working electrode by solution coating method as follows: the newly prepared sample (5 mg) and Nafion (10  $\mu\text{L}$ ) dissolved in 0.5 mL ethanol with ultrasound and 40  $\mu\text{L}$  solution was uniformly dropped on clean FTO conductive glass ( $1.0 \times 4.0 \text{ cm}^2$ ,  $10 \Omega \cdot \text{cm}^{-2}$ ). The photocurrent experiment was carried out on the CHI760E electrochemical workstation of the three electrode system, in which Pt sheet was the counter electrode and Ag/AgCl electrode was the reference electrode. The experiment was carried out in 0.2 M  $\text{Na}_2\text{SO}_4$  electrolyte at room temperature, and a 300 W high-pressure xenon lamp (full band) was used as a visible light source.

## Cyclic voltammetric measurement

We prepared the working electrode by solution coating method as follows: the newly prepared sample (5 mg) and Nafion (10  $\mu\text{L}$ ) dissolved in 0.5 ml ethanol with ultrasound and 40  $\mu\text{L}$  solution was uniformly dropped on clean FTO conductive glass ( $1.0 \times 4.0 \text{ cm}^2$ ,  $10 \Omega \cdot \text{cm}^{-2}$ ). The photocurrent experiment was carried out on the CHI760E electrochemical workstation of the three electrode system, in which Pt sheet was the counter electrode and Ag/AgCl electrode was the reference electrode. The experiment was carried out in 0.2 M  $\text{Na}_2\text{SO}_4$  electrolyte at room temperature, and CV cycles were measured at scan rate of  $50 \text{ mV} \cdot \text{s}^{-1}$ .

## Single crystal synthesis and characterization of compounds

### Single crystal structure determination

Table S1. Crystal data and structure refinement for compounds 1 to 7.

| Compounds       | 1                                                                         | 2                                                              | 3                                                    | 4                                                              |
|-----------------|---------------------------------------------------------------------------|----------------------------------------------------------------|------------------------------------------------------|----------------------------------------------------------------|
| Formula         | $\text{C}_{86}\text{H}_{74}\text{Fe}_3\text{In}_2\text{O}_{21}\text{P}_2$ | $\text{C}_{48}\text{H}_{46}\text{Fe}_2\text{InO}_{13}\text{P}$ | $\text{C}_{24}\text{FeInN}_2\text{O}_9\text{H}_{19}$ | $\text{C}_{29}\text{H}_{26}\text{ClFeInN}_3\text{O}_6\text{S}$ |
| Weight          | 1902.58                                                                   | 1088.34                                                        | 650.08                                               | 750.71                                                         |
| Crystal system  | monoclinic                                                                | monoclinic                                                     | orthorhombic                                         | monoclinic                                                     |
| Space group     | $C2/c$                                                                    | $P2_1/c$                                                       | $Pnna$                                               | $P2/c$                                                         |
| $a/\text{\AA}$  | 16.14000(10)                                                              | 10.17060(10)                                                   | 9.5846(15)                                           | 12.5179(3)                                                     |
| $b/\text{\AA}$  | 15.74500(10)                                                              | 20.3048(2)                                                     | 10.3814(18)                                          | 13.4210(5)                                                     |
| $c/\text{\AA}$  | 29.8741(2)                                                                | 21.23650(10)                                                   | 24.795(2)                                            | 17.7970(7)                                                     |
| $\alpha/^\circ$ | 90                                                                        | 90                                                             | 90                                                   | 90                                                             |

|                                            |                                    |                                    |                                    |                                    |
|--------------------------------------------|------------------------------------|------------------------------------|------------------------------------|------------------------------------|
| $\beta/^\circ$                             | 101.4600(10)                       | 91.3550(10)                        | 90                                 | 95.078(3)                          |
| $\gamma/^\circ$                            | 90                                 | 90                                 | 90                                 | 90                                 |
| Volume/ $\text{\AA}^3$                     | 7440.38(9)                         | 4384.37(6)                         | 2467.2(6)                          | 2978.21(18)                        |
| Z                                          | 4                                  | 4                                  | 4                                  | 4                                  |
| $\rho_{\text{calc}}/\text{cm}^3$           | 1.698                              | 1.649                              | 1.75                               | 1.674                              |
| GOOF                                       | 1.056                              | 1.034                              | 1.091                              | 1.085                              |
| Final R indexes<br>[ $I \geq 2\sigma(I)$ ] | $R_1 = 0.0314,$<br>$wR_2 = 0.0846$ | $R_1 = 0.0445,$<br>$wR_2 = 0.1065$ | $R_1 = 0.0916,$<br>$wR_2 = 0.1718$ | $R_1 = 0.0696,$<br>$wR_2 = 0.2119$ |
| Final R indexes<br>[all data]              | $R_1 = 0.0333,$<br>$wR_2 = 0.0857$ | $R_1 = 0.0509,$<br>$wR_2 = 0.1097$ | $R_1 = 0.1273,$<br>$wR_2 = 0.1877$ | $R_1 = 0.0803,$<br>$wR_2 = 0.2253$ |
| CCDC No.                                   | 2204902                            | 2204903                            | 2204897                            | 2204900                            |

| Compounds                                  | 5                                                    | 6                                                             | 7                                                    |
|--------------------------------------------|------------------------------------------------------|---------------------------------------------------------------|------------------------------------------------------|
| Formula                                    | $\text{C}_{37}\text{H}_{28}\text{ClFeInO}_6\text{P}$ | $\text{C}_{36}\text{H}_{32}\text{Cl}_2\text{FeInO}_6\text{P}$ | $\text{C}_{15}\text{H}_{13}\text{FeInN}_2\text{O}_5$ |
| Weight                                     | 805.68                                               | 833.15                                                        | 471.94                                               |
| Crystal system                             | triclinic                                            | monoclinic                                                    | orthorhombic                                         |
| Space group                                | <i>P</i> -1                                          | <i>P</i> 2 <sub>1</sub> / <i>c</i>                            | <i>Pbca</i>                                          |
| <i>a</i> / $\text{\AA}$                    | 10.1386(3)                                           | 10.27250(10)                                                  | 18.1609(7)                                           |
| <i>b</i> / $\text{\AA}$                    | 12.2014(4)                                           | 28.3286(4)                                                    | 9.7351(5)                                            |
| <i>c</i> / $\text{\AA}$                    | 13.8268(3)                                           | 11.8384(2)                                                    | 22.3468(10)                                          |
| $\alpha/^\circ$                            | 79.370(2)                                            | 90                                                            | 90                                                   |
| $\beta/^\circ$                             | 87.630(2)                                            | 101.0380(10)                                                  | 90                                                   |
| $\gamma/^\circ$                            | 84.833(2)                                            | 90                                                            | 90                                                   |
| Volume/ $\text{\AA}^3$                     | 1673.73(8)                                           | 3381.31(8)                                                    | 3950.9(3)                                            |
| Z                                          | 2                                                    | 4                                                             | 8                                                    |
| $\rho_{\text{calc}}/\text{cm}^3$           | 1.599                                                | 1.637                                                         | 1.587                                                |
| GOOF                                       | 1.022                                                | 1.049                                                         | 1.107                                                |
| Final R indexes<br>[ $I \geq 2\sigma(I)$ ] | $R_1 = 0.0868,$<br>$wR_2 = 0.2099$                   | $R_1 = 0.0356,$<br>$wR_2 = 0.0951$                            | $R_1 = 0.0752,$<br>$wR_2 = 0.1712$                   |
| Final R indexes<br>[all data]              | $R_1 = 0.1506,$<br>$wR_2 = 0.2302$                   | $R_1 = 0.0447,$<br>$wR_2 = 0.1000$                            | $R_1 = 0.1058,$<br>$wR_2 = 0.1923$                   |
| CCDC No.                                   | 2204899                                              | 2204898                                                       | 2204901                                              |

Table S2. Selected bond lengths (Å) and angles (°) for **1**.

|                           |           |                         |           |
|---------------------------|-----------|-------------------------|-----------|
| In1-O11                   | 2.251(2)  | O2ii-In1-O4             | 150.39(7) |
| In1-O8 <sup>i</sup>       | 2.242(2)  | O2ii-In1-O10            | 126.82(8) |
| In1-O2 <sup>ii</sup>      | 2.273(2)  | O3-In1-O11              | 97.46(9)  |
| In1-O3                    | 2.154(2)  | O3-In1-O8 <sup>i</sup>  | 90.59(8)  |
| In1-O9                    | 2.189(2)  | O3-In1-O2ii             | 139.56(8) |
| In1-O1 <sup>ii</sup>      | 2.295(2)  | O3-In1-O9               | 136.50(8) |
| In1-O4                    | 2.572(2)  | O3-In1-O1 <sup>ii</sup> | 82.41(8)  |
| In1-O10                   | 2.404(3)  | O3-In1-O4               | 54.69(8)  |
| O11-In1-O2 <sup>ii</sup>  | 83.83(8)  | O3-In1-O10              | 83.84(8)  |
| O11-In1-O1 <sup>ii</sup>  | 83.30(9)  | O9-In1-O11              | 106.72(9) |
| O11-In1-O4                | 123.83(8) | O9-In1-O8 <sup>i</sup>  | 75.63(7)  |
| O11-In1-O10               | 55.70(9)  | O9-In1-O2 <sup>ii</sup> | 79.71(8)  |
| O8i-In1-O11               | 164.26(9) | O9-In1-O1 <sup>ii</sup> | 135.08(8) |
| O8i-In1-O2 <sup>ii</sup>  | 81.29(7)  | O9-In1-O4               | 81.84(7)  |
| O8i-In1-O1 <sup>ii</sup>  | 84.40(8)  | O9-In1-O10              | 80.93(8)  |
| O8i-In1-O4                | 71.79(7)  | O1ii-In1-O4             | 129.28(7) |
| O8i-In1-O10               | 139.12(8) | O1ii-In1-O10            | 134.31(8) |
| O2ii-In1-O1 <sup>ii</sup> | 57.48(7)  | O10-In1-O4              | 72.10(8)  |

Symmetry codes: (i)  $-x+1, y, -z+1/2$ ; (ii)  $-x+3/2, y-1/2, -z+1/2$ .Table S3. Selected bond lengths (Å) and angles (°) for **2**.

|                                       |           |                                        |            |
|---------------------------------------|-----------|----------------------------------------|------------|
| In1-O6 <sup>i</sup>                   | 2.244(2)  | O4-In1-O3                              | 57.33(8)   |
| In1-O4                                | 2.260(2)  | O7 <sup>i</sup> -In1-O4                | 77.86(8)   |
| In1-O7 <sup>i</sup>                   | 2.248(2)  | O7 <sup>i</sup> -In1-O5 <sup>ii</sup>  | 131.43(8)  |
| In1-O5 <sup>ii</sup>                  | 2.275(2)  | O7 <sup>i</sup> -In1-O8 <sup>ii</sup>  | 84.98(9)   |
| In1-O8 <sup>ii</sup>                  | 2.272(2)  | O7 <sup>i</sup> -In1-O3                | 122.30(8)  |
| In1-O2                                | 2.141(2)  | O5 <sup>ii</sup> -In1-O3               | 84.17(8)   |
| In1-O3                                | 2.313(2)  | O8 <sup>ii</sup> -In1-O5 <sup>ii</sup> | 57.59(9)   |
| O6 <sup>i</sup> -In1-O4               | 90.21(8)  | O8 <sup>ii</sup> -In1-O3               | 141.40(9)  |
| O6 <sup>i</sup> -In1-O7 <sup>i</sup>  | 58.71(9)  | O2-In1-O6 <sup>i</sup>                 | 167.75(10) |
| O6 <sup>i</sup> -In1-O5 <sup>ii</sup> | 87.87(8)  | O2-In1-O4                              | 87.14(9)   |
| O6i-In1-O8 <sup>ii</sup>              | 88.15(8)  | O2-In1-O7 <sup>i</sup>                 | 132.00(10) |
| O6 <sup>i</sup> -In1-O3               | 85.13(8)  | O2-In1-O5 <sup>ii</sup>                | 86.78(9)   |
| O4-In1-O5 <sup>ii</sup>               | 141.46(9) | O2-In1-O8 <sup>ii</sup>                | 98.23(9)   |
| O4-In1-O8 <sup>ii</sup>               | 160.80(9) | O2-In1-O3                              | 83.38(9)   |

Symmetry codes: (i)  $x, -y+1/2, z+1/2$ ; (ii)  $x+1, y, z$ .Table S4. Selected bond lengths (Å) and angles (°) for **3**.

|                                         |           |                                        |          |
|-----------------------------------------|-----------|----------------------------------------|----------|
| In1-O3                                  | 2.201(6)  | O4 <sup>iii</sup> -In1-O1 <sup>i</sup> | 74.9(2)  |
| In1-O3 <sup>i</sup>                     | 2.201(6)  | O4 <sup>iii</sup> -In1-O1              | 125.7(3) |
| In1-O4 <sup>ii</sup>                    | 2.236(6)  | O4 <sup>ii</sup> -In1-O1 <sup>i</sup>  | 125.7(3) |
| In1-O4 <sup>iii</sup>                   | 2.236(6)  | O4 <sup>ii</sup> -In1-O1               | 74.9(2)  |
| In1-O2                                  | 2.170(7)  | O2 <sup>i</sup> -In1-O3                | 150.6(3) |
| In1-O2 <sup>i</sup>                     | 2.170(7)  | O2 <sup>i</sup> -In1-O3 <sup>i</sup>   | 91.7(3)  |
| In1-O1 <sup>i</sup>                     | 2.582(10) | O2-In1-O3                              | 91.7(3)  |
| In1-O1                                  | 2.582(10) | O2-In1-O3 <sup>i</sup>                 | 150.6(3) |
| O3-In1-O3 <sup>i</sup>                  | 97.9(3)   | O2 <sup>i</sup> -In1-O4 <sup>iii</sup> | 128.2(3) |
| O3 <sup>i</sup> -In1-O4 <sup>iii</sup>  | 74.0(2)   | O2-In1-O4 <sup>ii</sup>                | 128.2(3) |
| O3-In1-O4 <sup>iii</sup>                | 81.2(2)   | O2-In1-O4 <sup>iii</sup>               | 80.2(3)  |
| O3 <sup>i</sup> -In1-O4 <sup>ii</sup>   | 81.2(2)   | O2 <sup>i</sup> -In1-O4 <sup>ii</sup>  | 80.2(3)  |
| O3-In1-O4 <sup>ii</sup>                 | 74.0(2)   | O2-In1-O2 <sup>i</sup>                 | 93.3(4)  |
| O3-In1-O1 <sup>i</sup>                  | 156.0(2)  | O2 <sup>i</sup> -In1-O1 <sup>i</sup>   | 53.4(3)  |
| O3 <sup>i</sup> -In1-O1 <sup>i</sup>    | 74.6(2)   | O2-In1-O1                              | 53.4(3)  |
| O3-In1-O1                               | 74.6(2)   | O2-In1-O1 <sup>i</sup>                 | 85.4(3)  |
| O3 <sup>i</sup> -In1-O1                 | 156.0(2)  | O2 <sup>i</sup> -In1-O1                | 85.4(3)  |
| O4 <sup>ii</sup> -In1-O4 <sup>iii</sup> | 141.8(3)  | O1 <sup>i</sup> -In1-O1                | 120.9(3) |

Symmetry codes: (i)  $-x+1/2, -y+1, z$ ; (ii)  $-x+1, -y+1, -z+1$ ; (iii)  $x-1/2, y, -z+1$ .

Table S5. Selected bond lengths (Å) and angles (°) for **4**.

|                                       |            |                                        |            |
|---------------------------------------|------------|----------------------------------------|------------|
| In1-Cl1                               | 2.3940(18) | O3-In1-Cl1                             | 98.19(13)  |
| In1-O2                                | 2.346(5)   | O3-In1-O2                              | 79.66(17)  |
| In1-O4 <sup>i</sup>                   | 2.206(5)   | O3-In1-O5 <sup>ii</sup>                | 133.17(18) |
| In1-O3                                | 2.216(4)   | O3-In1-O6 <sup>ii</sup>                | 78.38(18)  |
| In1-O5 <sup>ii</sup>                  | 2.287(5)   | O5 <sup>ii</sup> -In1-Cl1              | 100.89(13) |
| In1-O1                                | 2.208(5)   | O5 <sup>ii</sup> -In1-O2               | 141.73(17) |
| In1-O6 <sup>ii</sup>                  | 2.292(5)   | O5 <sup>ii</sup> -In1-O6 <sup>ii</sup> | 57.42(17)  |
| O2-In1-Cl1                            | 90.74(13)  | O1-In1-Cl1                             | 98.04(14)  |
| O4 <sup>i</sup> -In1-Cl1              | 173.08(12) | O1-In1-O2                              | 57.79(16)  |
| O4 <sup>i</sup> -In1-O2               | 84.94(18)  | O1-In1-O3                              | 134.37(18) |
| O4 <sup>i</sup> -In1-O3               | 75.74(17)  | O1-In1-O5 <sup>ii</sup>                | 84.36(17)  |
| O4 <sup>i</sup> -In1-O5 <sup>ii</sup> | 85.81(17)  | O1-In1-O6 <sup>ii</sup>                | 141.13(18) |
| O4 <sup>i</sup> -In1-O1               | 84.24(17)  | O6 <sup>ii</sup> -In1-Cl1              | 96.11(14)  |
| O4 <sup>i</sup> -In1-O6 <sup>ii</sup> | 86.01(18)  | O6 <sup>ii</sup> -In1-O2               | 157.71(17) |

Symmetry codes: (i)  $-x, -y+1, -z+1$ ; (ii)  $x, -y+1, z-1/2$ .

Table S6. Selected bond lengths (Å) and angles (°) for **5**.

|                         |            |                              |            |
|-------------------------|------------|------------------------------|------------|
| In01-Cl03               | 2.4725(17) | O007-In01-Cl03               | 99.44(14)  |
| In01-O005 <sup>i</sup>  | 2.236(4)   | O007-In01-O005 <sup>i</sup>  | 85.76(17)  |
| In01-O006 <sup>ii</sup> | 2.233(5)   | O007-In01-O006 <sup>ii</sup> | 85.78(16)  |
| In01-O007               | 2.195(4)   | O007-In01-O008 <sup>ii</sup> | 142.46(18) |
| In01-O008 <sup>ii</sup> | 2.321(4)   | O007-In01-O009               | 134.06(18) |

|                                             |            |                               |            |
|---------------------------------------------|------------|-------------------------------|------------|
| In01-O009                                   | 2.219(5)   | O007-In01-O001                | 57.26(17)  |
| In01-O001                                   | 2.320(5)   | O008 <sup>ii</sup> -In01-Cl03 | 90.67(14)  |
| O005 <sup>i</sup> -In01-Cl03                | 174.79(11) | O009-In01-Cl03                | 101.57(13) |
| O005 <sup>i</sup> -In01-O008 <sup>ii</sup>  | 85.03(17)  | O009-In01-O005 <sup>i</sup>   | 74.66(17)  |
| O005 <sup>i</sup> -In01-O001                | 93.50(17)  | O009-In01-O006 <sup>ii</sup>  | 131.02(16) |
| O006 <sup>ii</sup> -In01-Cl03               | 96.64(13)  | O009-In01-O008 <sup>ii</sup>  | 77.53(18)  |
| O006 <sup>ii</sup> -In01-O005 <sup>i</sup>  | 83.49(17)  | O009-In01-O001                | 82.51(17)  |
| O006 <sup>ii</sup> -In01-O008 <sup>ii</sup> | 57.04(17)  | O001-In01-Cl03                | 89.51(14)  |
| O006 <sup>ii</sup> -In01-O001               | 143.04(16) | O001-In01-O008 <sup>ii</sup>  | 159.66(18) |

Symmetry codes: (i)  $-x+2, -y, -z+2$ ; (ii)  $x+1, y, z$ .

Table S7. Selected bond lengths (Å) and angles (°) for **6**.

|                        |           |                                      |            |
|------------------------|-----------|--------------------------------------|------------|
| In1-Cl2                | 2.4868(8) | O5-In1-O2 <sup>i</sup>               | 163.77(9)  |
| In1-Cl1                | 2.4774(9) | O5-In1-O4                            | 84.30(10)  |
| In1-O006               | 2.343(3)  | O3 <sup>i</sup> -In1-Cl2             | 90.78(7)   |
| In1-O5                 | 2.244(2)  | O3 <sup>i</sup> -In1-Cl1             | 89.55(7)   |
| In1-O3 <sup>i</sup>    | 2.252(2)  | O3 <sup>i</sup> -In1-O006            | 82.25(9)   |
| In1-O2 <sup>i</sup>    | 2.327(3)  | O3 <sup>i</sup> -In1-O2 <sup>i</sup> | 56.94(9)   |
| In1-O4                 | 2.268(3)  | O3 <sup>i</sup> -In1-O4              | 136.70(10) |
| Cl1-In1-Cl2            | 179.16(3) | O2 <sup>i</sup> -In1-Cl2             | 88.73(7)   |
| O006-In1-Cl2           | 91.64(6)  | O2 <sup>i</sup> -In1-Cl1             | 90.81(7)   |
| O006-In1-Cl1           | 89.17(7)  | O2 <sup>i</sup> -In1-O006            | 139.19(8)  |
| O5-In1-Cl2             | 87.98(7)  | O4-In1-Cl2                           | 91.74(7)   |
| O5-In1-Cl1             | 92.27(7)  | O4-In1-Cl1                           | 87.49(7)   |
| O5-In1-O006            | 56.83(8)  | O4-In1-O006                          | 140.82(10) |
| O5-In1-O3 <sup>i</sup> | 138.99(9) | O4-In1-O2 <sup>i</sup>               | 79.92(10)  |

Symmetry codes: (i)  $x+1, y, z$ .

Table S8. Hydrogen bond parameters for **6**.

| D-H-A                    | d(D-H)/Å | d(H-A)/Å | d(D-A)/Å | D-H-A/° |
|--------------------------|----------|----------|----------|---------|
| O4-H4B-O006 <sup>i</sup> | 0.87     | 2.02     | 2.773(4) | 144.5   |
| O1-H1A-O3 <sup>ii</sup>  | 0.87     | 2.11     | 2.964(4) | 168.4   |

Symmetry codes: (i)  $x, 1/2-y, -1/2+z$ ; (ii)  $1-x, 1-y, 2-z$ .

Table S9. Selected bond lengths (Å) and angles (°) for **7**.

|                     |          |                                       |          |
|---------------------|----------|---------------------------------------|----------|
| In1-O1              | 2.224(6) | O3 <sup>i</sup> -In1-O5 <sup>i</sup>  | 56.0(2)  |
| In1-O2              | 2.292(6) | O3 <sup>i</sup> -In1-Cl1 <sup>i</sup> | 28.2(3)  |
| In1-O3 <sup>i</sup> | 2.303(6) | O4-In1-Cl1 <sup>i</sup>               | 163.0(3) |
| In1-O4              | 2.366(6) | O5 <sup>i</sup> -In1-O4               | 169.1(2) |
| In1-O5 <sup>i</sup> | 2.344(7) | O5 <sup>i</sup> -In1-Cl1 <sup>i</sup> | 27.8(3)  |
| In1-N1              | 2.190(7) | N1-In1-O1                             | 91.0(3)  |

|                         |          |                                       |          |
|-------------------------|----------|---------------------------------------|----------|
| In1-N2 <sup>ii</sup>    | 2.197(6) | N1-In1-O2                             | 140.8(2) |
| In1-C1 <sup>i</sup>     | 2.691(9) | N1-In1-O3 <sup>i</sup>                | 140.5(2) |
| O1-In1-O2               | 87.0(3)  | N1-In1-O4                             | 84.6(2)  |
| O1-In1-O3 <sup>i</sup>  | 88.8(3)  | N1-In1-O5 <sup>i</sup>                | 84.6(2)  |
| O1-In1-O4               | 90.2(3)  | N1-In1-N2 <sup>ii</sup>               | 93.4(3)  |
| O1-In1-O5 <sup>i</sup>  | 89.1(3)  | N1-In1-C1 <sup>i</sup>                | 112.4(3) |
| O1-In1-C1 <sup>i</sup>  | 88.1(3)  | N2 <sup>ii</sup> -In1-O1              | 174.8(3) |
| O2-In1-O3 <sup>i</sup>  | 78.6(2)  | N2 <sup>ii</sup> -In1-O2              | 87.8(3)  |
| O2-In1-O4               | 56.3(2)  | N2 <sup>ii</sup> -In1-O3 <sup>i</sup> | 89.6(2)  |
| O2-In1-O5 <sup>i</sup>  | 134.5(2) | N2 <sup>ii</sup> -In1-O4              | 87.4(2)  |
| O2-In1-C1 <sup>i</sup>  | 106.7(3) | N2 <sup>ii</sup> -In1-O5 <sup>i</sup> | 94.2(3)  |
| O3 <sup>i</sup> -In1-O4 | 134.9(2) | N2 <sup>ii</sup> -In1-C1 <sup>i</sup> | 92.8(3)  |

Symmetry codes: (i)  $-x+1, -y+1, -z+1$ ; (ii)  $-x+1/2, y-1/2$ .

### Infrared spectrum analysis

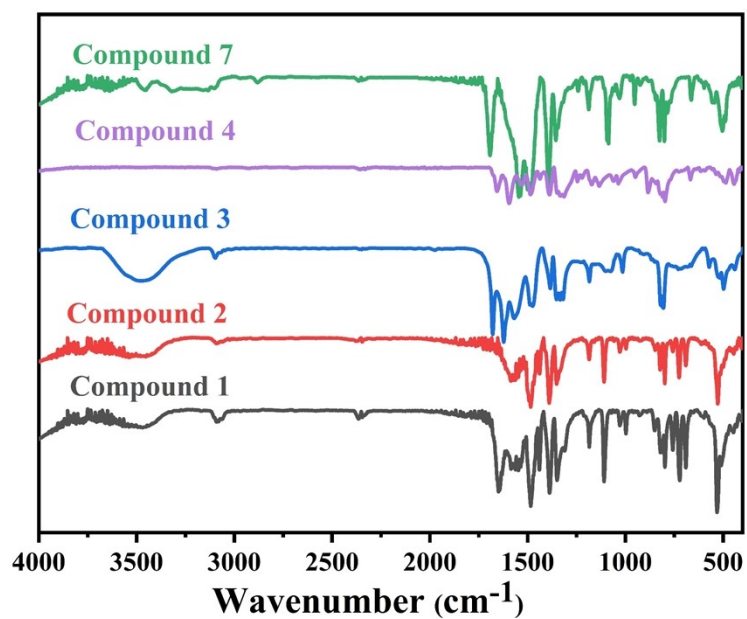

*Figure S1.* Infrared (IR) spectroscopy of **1** to **4** and **7**.

## $^1\text{H}$ NMR spectra

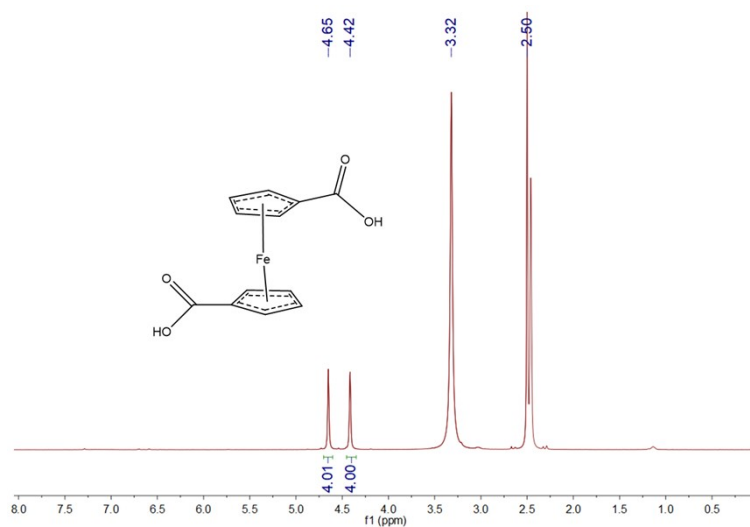

**Figure S2.**  $^1\text{H}$  NMR spectra of the  $\text{H}_2\text{FcDCA}$ :  $^1\text{H}$  NMR (400 MHz,  $\text{DMSO-}d_6$ )  $\delta$  4.65 (s, 4H), 4.42 (s, 4H).

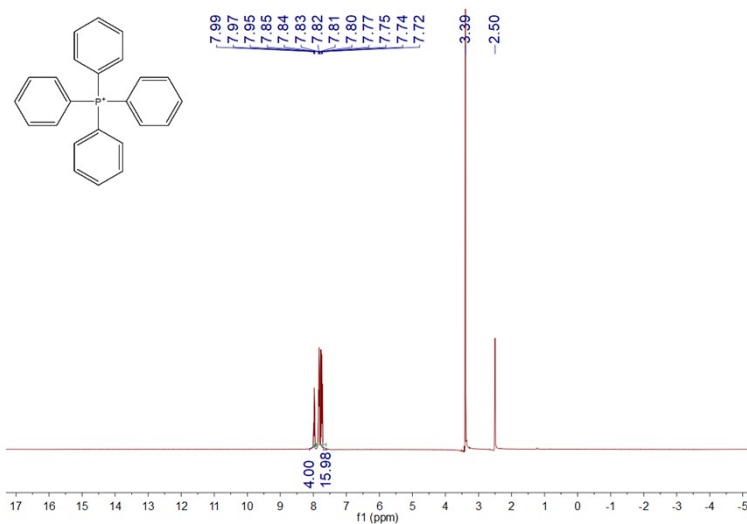

**Figure S3.**  $^1\text{H}$  NMR spectra of the  $\text{TPP}^+$ :  $^1\text{H}$  NMR (400 MHz, )  $\delta$  7.97 (t,  $J = 7.5$  Hz, 4H), 7.85 – 7.72 (m, 16H).



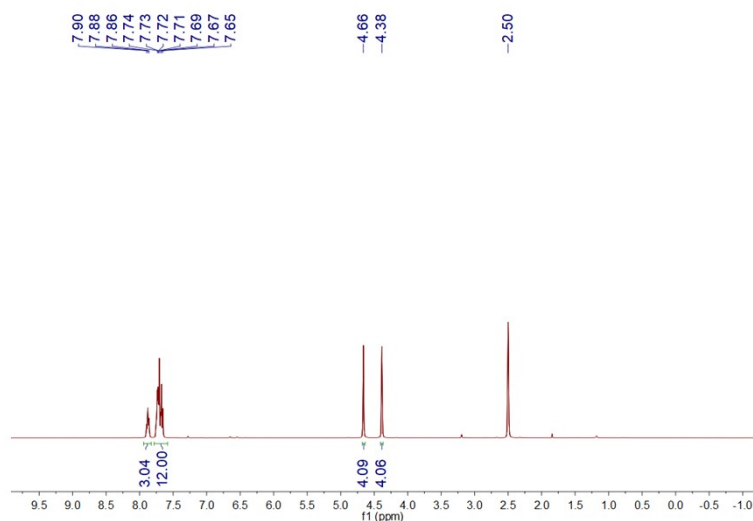

**Figure S4.**  $^1\text{H}$  NMR spectra of the **1**:  $^1\text{H}$  NMR (400 MHz,  $\text{DMSO-}d_6$ )  $\delta$  7.88 (t,  $J = 7.0$  Hz, 3H,  $\text{TPP}^+$ ), 7.74 – 7.65 (m, 12H,  $\text{TPP}^+$ ), 4.66 (s, 4H,  $\text{FcDCA}^{2-}$ ), 4.38 (s, 4H,  $\text{FcDCA}^{2-}$ ).

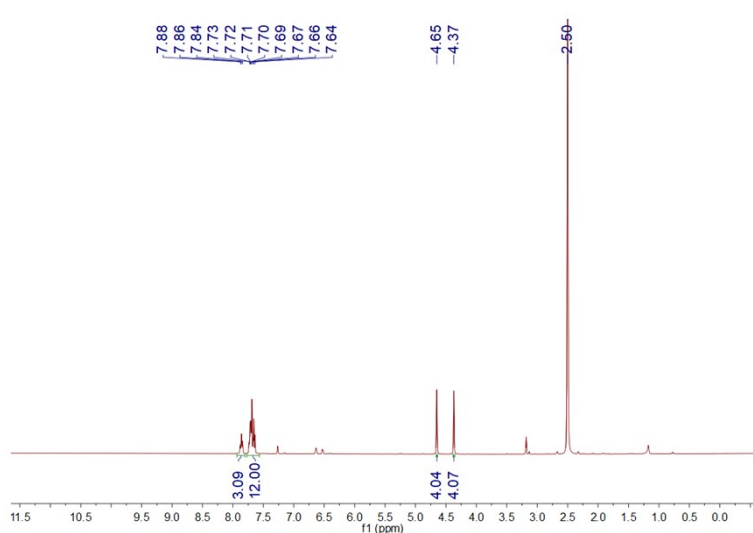

**Figure S5.**  $^1\text{H}$  NMR spectra of the **2**:  $^1\text{H}$  NMR (400 MHz,  $\text{DMSO-}d_6$ )  $\delta$  7.86 (t,  $J = 7.0$  Hz, 3H,  $\text{TPP}^+$ ), 7.73 – 7.64 (m, 12H,  $\text{TPP}^+$ ), 4.65 (s, 4H,  $\text{FcDCA}^{2-}$ ), 4.37 (s, 4H,  $\text{FcDCA}^{2-}$ ).

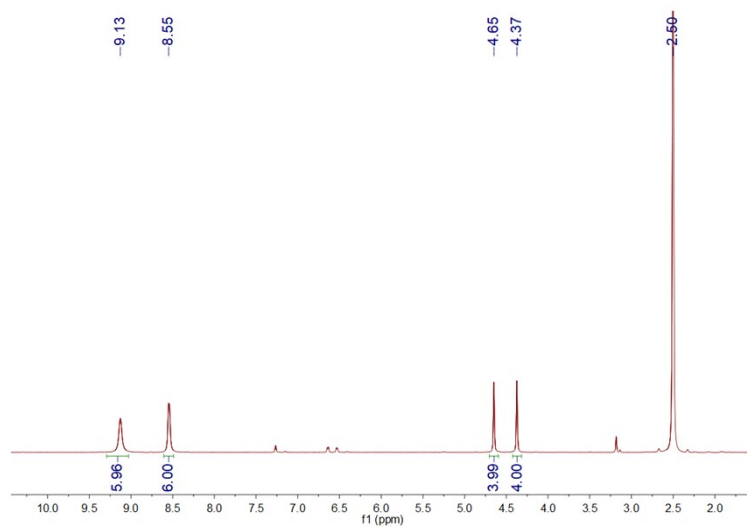

**Figure S6.**  $^1\text{H}$  NMR spectra of the **3**:  $^1\text{H}$  NMR (400 MHz,  $\text{DMSO}-d_6$ )  $\delta$  9.13 (s, 6H, bpy), 8.55 (s, 6H, bpy), 4.65 (s, 4H,  $\text{FcDCA}^{2-}$ ), 4.37 (s, 4H,  $\text{FcDCA}^{2-}$ ).

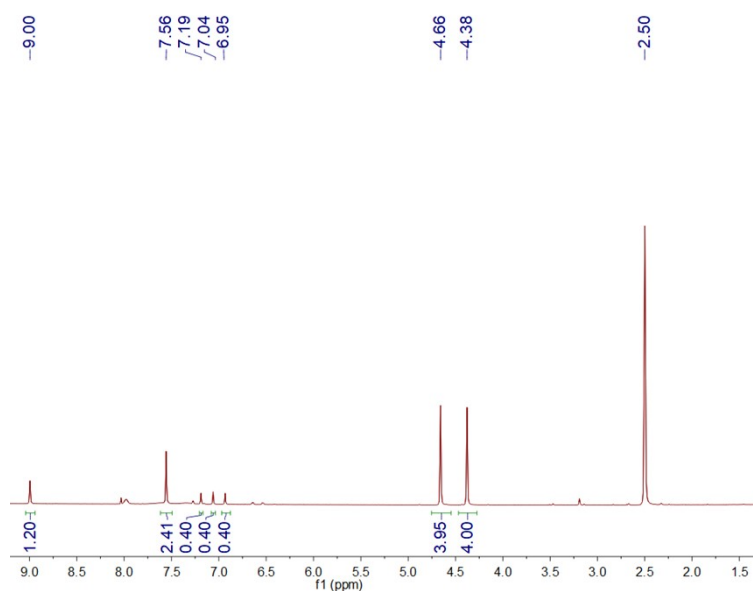

**Figure S7.**  $^1\text{H}$  NMR spectra of the **4**.

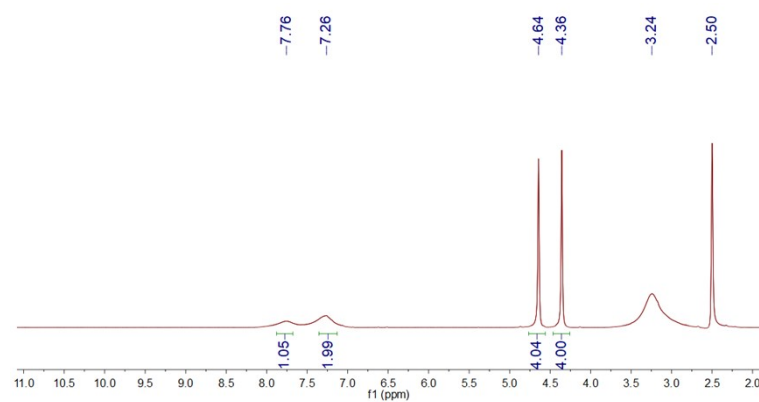

**Figure S8.**  $^1\text{H}$  NMR spectra of the **7**:  $^1\text{H}$  NMR (400 MHz,  $\text{DMSO}-d_6$ )  $\delta$  7.76 (s, 1H,  $\text{Im}^-$ ), 7.26 (s, 2H,  $\text{Im}^-$ ), 4.64 (s, 4H,  $\text{FcDCA}^{2-}$ ), 4.36 (s, 4H,  $\text{FcDCA}^{2-}$ ).

## Fluorescence

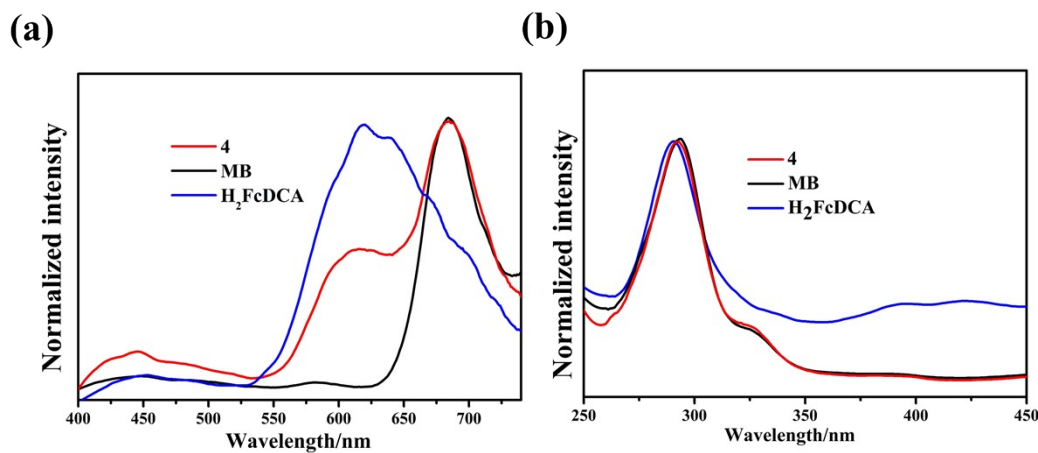

**Figure S9.** (a) Fluorescence emission (solid,  $\lambda_{ex} = 295$  nm) of **4**, H<sub>2</sub>FcDCA, MB; (b) Fluorescence excitation (solid,  $\lambda_{em} = 690$  nm) of **4**, H<sub>2</sub>FcDCA, MB.

$\pi$ -conjugated methylene blue has a strong absorption chromophore. We tested the fluorescence excitation and emission spectra of **4**, H<sub>2</sub>FcDCA and MB at room temperature. The maximum excitation peaks of these three compounds are very close. Through 295 nm wavelength excitation, H<sub>2</sub>FcDCA has weak fluorescence emission at about 600 nm, but MB has strong fluorescence emission at 690 nm, which is speculated to be generated by  $\pi \rightarrow \pi^*$  transition. The emission peaks of **4** at 600 nm and 690 nm correspond to ligand and guest respectively, so their luminescence mechanism is the same.

## Adsorption Characterization

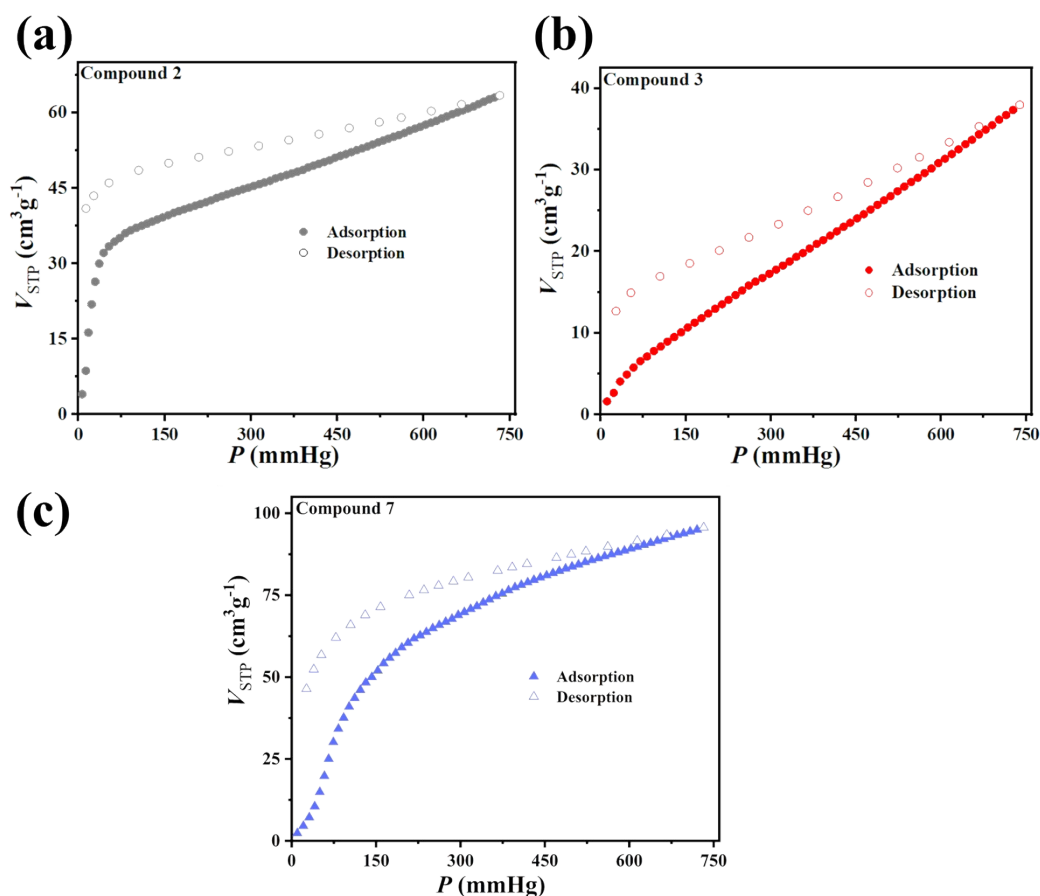

**Figure S10.** CO<sub>2</sub> adsorption at 195 K curves of **2** (a), **3** (b), **7** (d).

Activated compounds **2**, **3** and **7**: **2** and **3** were degassed under a dynamic vacuum at 100 °C for 6 h to activate the sample, respectively. Freshly prepared sample of **7** were soaked in methanol and heated at 60 °C. After 3 days, the guest formamide and polyethylene glycol was exchanged by methanol. Subsequently, **7** were degassed under a dynamic vacuum at 100 °C for 8 h to activate the sample. The permanent porosity of **2**, **3** and **7** was confirmed by the CO<sub>2</sub>-adsorption measurement at 195 K (Fig S10). The BET surface areas of **2**, **3** and **7** were  $\sim 294 \text{ m}^2 \cdot \text{g}^{-1}$ ,  $\sim 306 \text{ m}^2 \cdot \text{g}^{-1}$  and  $\sim 510 \text{ m}^2 \cdot \text{g}^{-1}$  respectively, which is comparable to the recent results.<sup>1,2</sup>

## PXRD analyses

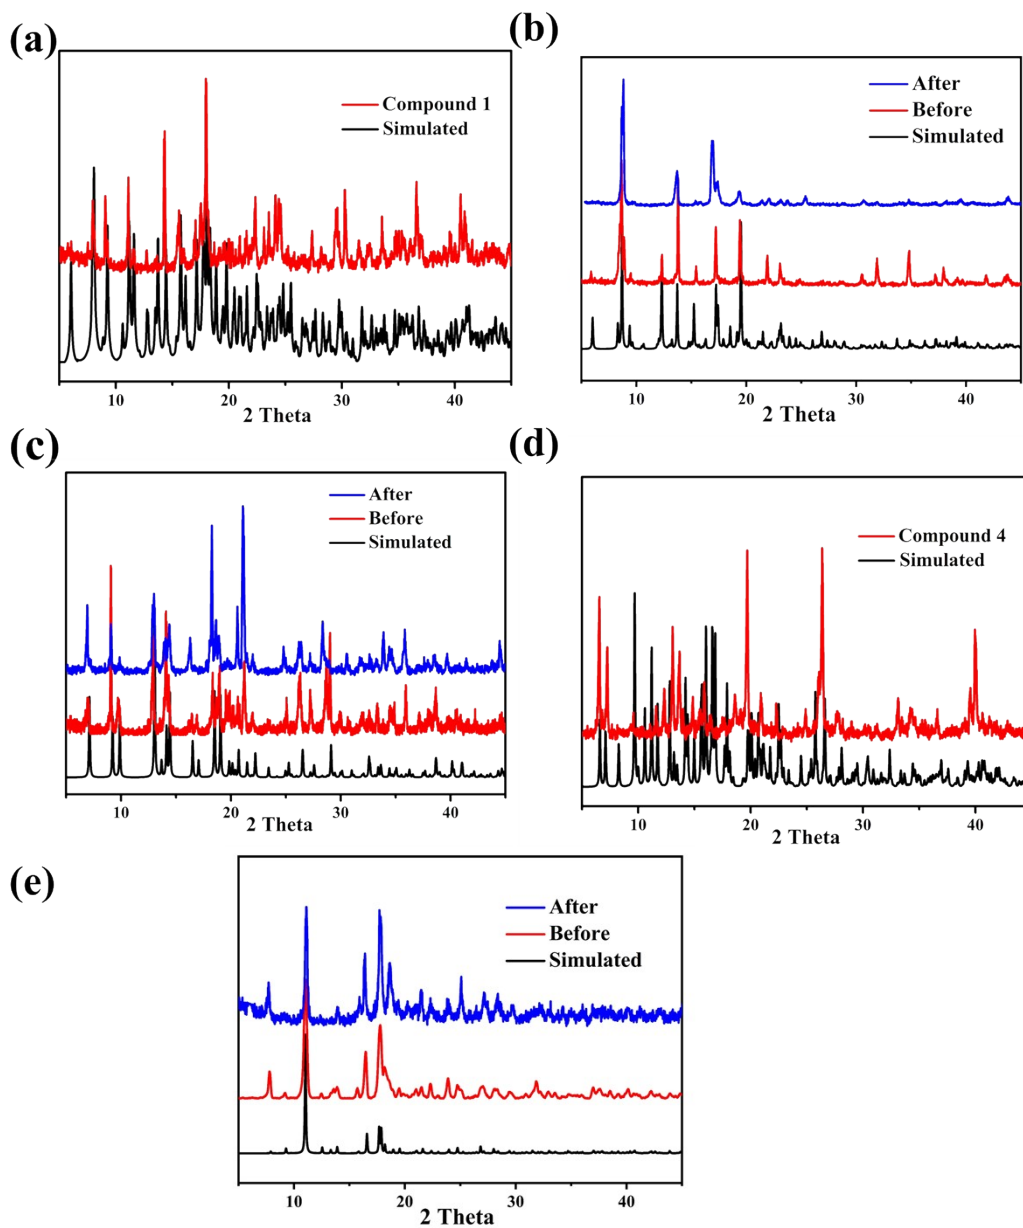

**Figure S11.** The PXRD patterns of compounds **1** (a) and **4** (d); PXRD of CO<sub>2</sub> adsorption of **2** (b) and **3** (c); PXRD of **7** before and after CO<sub>2</sub> adsorption tests.

## TGA curves

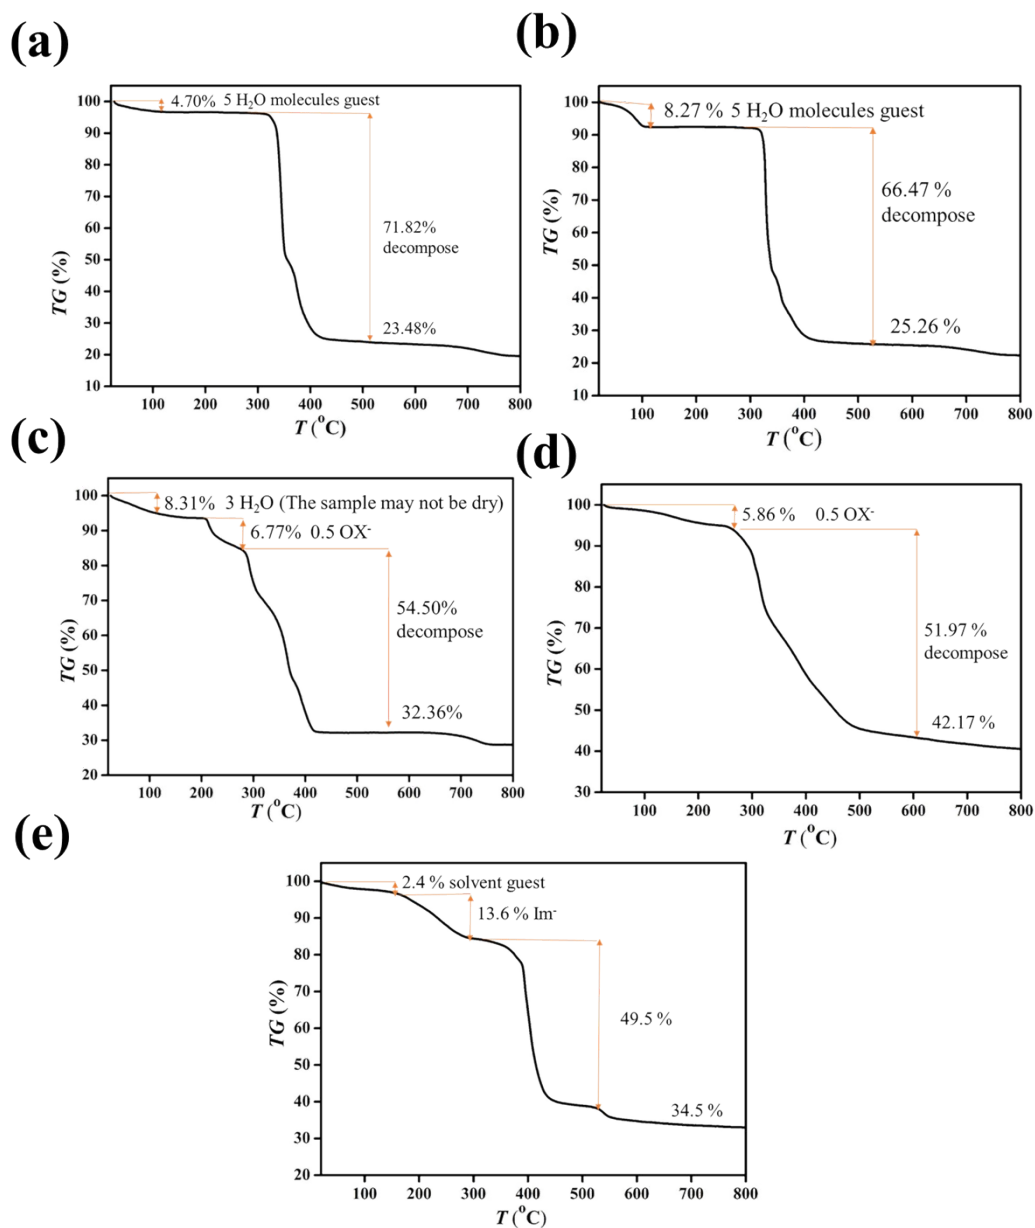

**Figure S12.** The TG plot of 1 (a), 2 (b), 3 (c), 4 (d) and 7 (e).

## Calculation of the nonlinear optical parameters

The following values are calculated and simulated according to the reported literature.<sup>3,4</sup>  $I_0$ : the on-axis peak intensity at the focus ( $Z = 0$ ),  $L_{\text{eff}}$ : the effective thickness of the sample,  $\alpha$  is the linear absorption coefficient, and  $l$  is the sample thickness;  $n_0$  is the refractive index of the medium (1.402);  $c$ : the speed of light;  $\text{Im } \chi^{(3)}$ : the imaginary

parts of the third-order susceptibility;  $Re \chi^{(3)}$ : the real parts of the third-order susceptibility;  $|\chi^{(3)}|$ : the absolute value of the third-order susceptibility.

$$T(Z, S = 1) = \frac{1}{\pi^2(Z, 0)} \int_{-\infty}^{\infty} \ln[1 + q_0(Z, 0)e^{-r^2}] dr \quad (1)$$

$$q_0(Z, 0) = \beta I_0 L_{eff} \quad (2)$$

$$L_{eff} = \frac{1 - e^{-\alpha l}}{\alpha} \quad (3)$$

$$\omega(Z) = \frac{\omega_0}{\left[1 + \left(\frac{Z}{Z_0}\right)^2\right]^{-0.5}} \quad (4)$$

$$Im\chi^{(3)}(esu) = \left(\frac{c^2 n_0^2 \beta (m/W)}{240\pi^2 \omega}\right) \quad (5)$$

$$Re\chi^{(3)}(esu) = \left(\frac{cn_0^2 n_2 (m^2/W)}{120\pi^2}\right) \quad (6)$$

$$|\chi^{(3)}| = \sqrt{|Im\chi^{(3)}|^2 + |Re\chi^{(3)}|^2} \quad (7)$$

### UV-Vis spectra

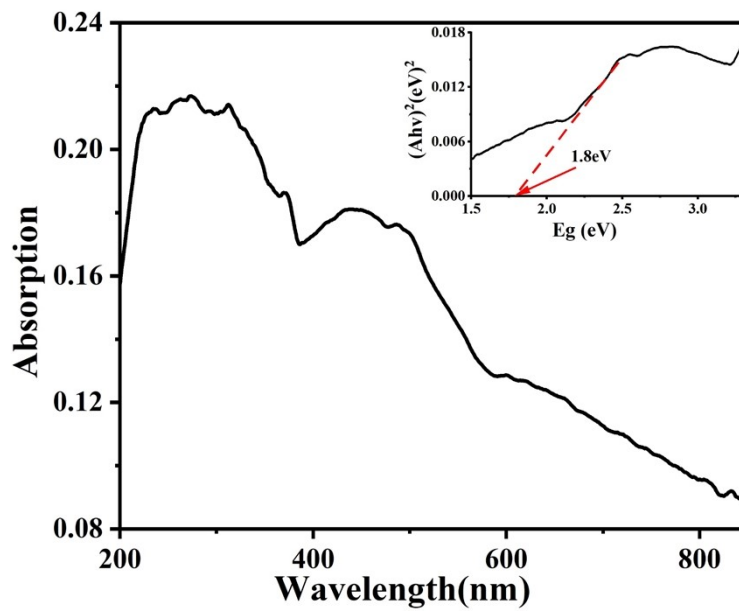

**Figure S13.** UV-Vis spectra of **1** and the band gap is 1.8 eV.

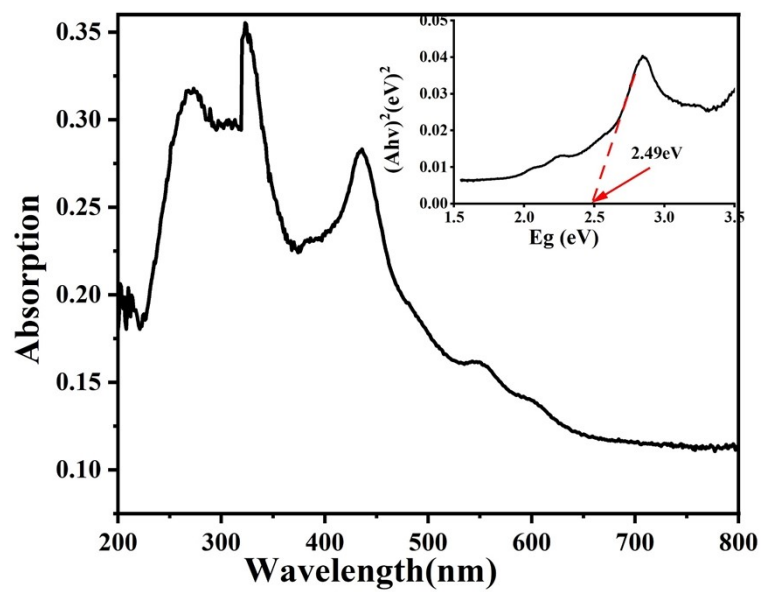

*Figure S14.* UV-Vis spectra of **2** and the band gap is 2.49 eV.

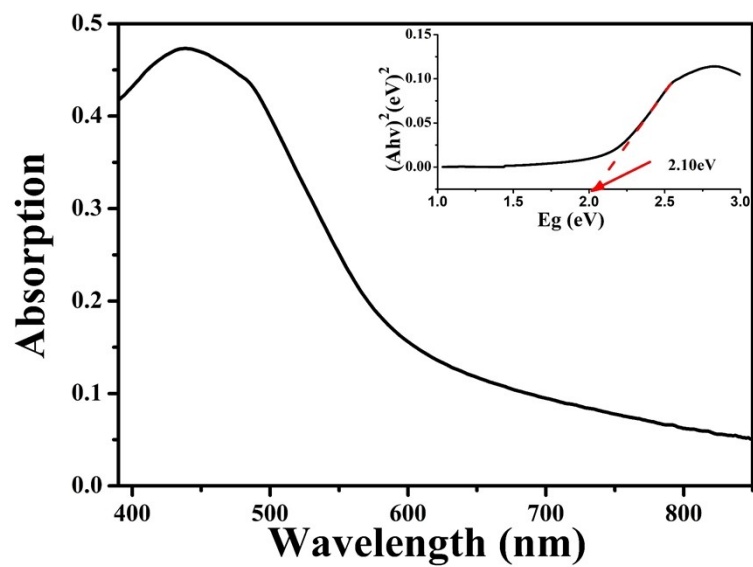

*Figure S15.* UV-Vis spectra of **3** and the band gap is 2.1 eV.



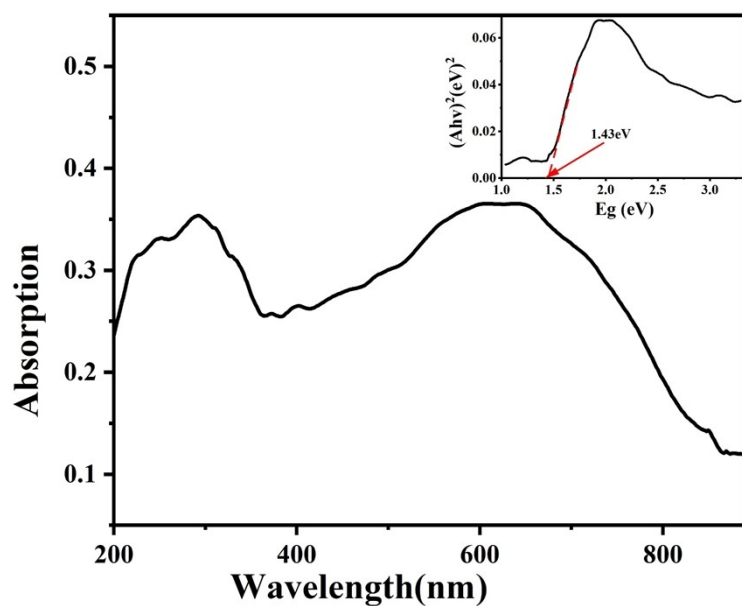

**Figure S16.** UV-Vis spectra of **4** and the band gap is 1.43 eV.

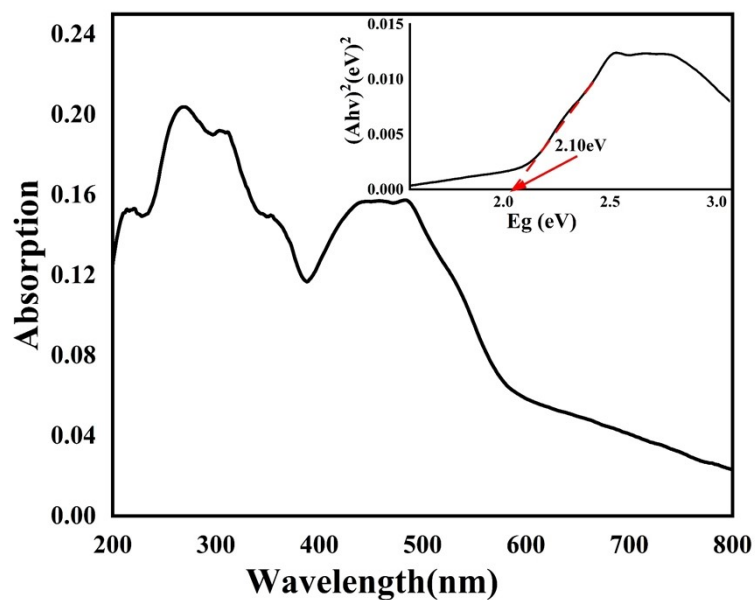

**Figure S17.** UV-Vis spectra of **7** and the band gap is 2.1 eV.

Cyclic voltammetric curves

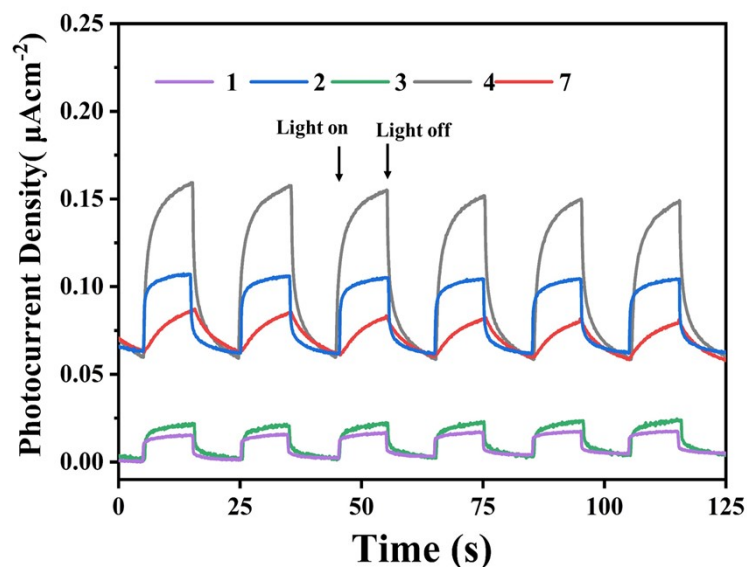

**Figure S18.** 0.2 V-bias photocurrent responses of electrodes derived for **1** to **4** and **7** in a 0.2 M  $\text{Na}_2\text{SO}_4$  aqueous solution under repetitive chopped visible light irradiation.

Cyclic voltammetric curves

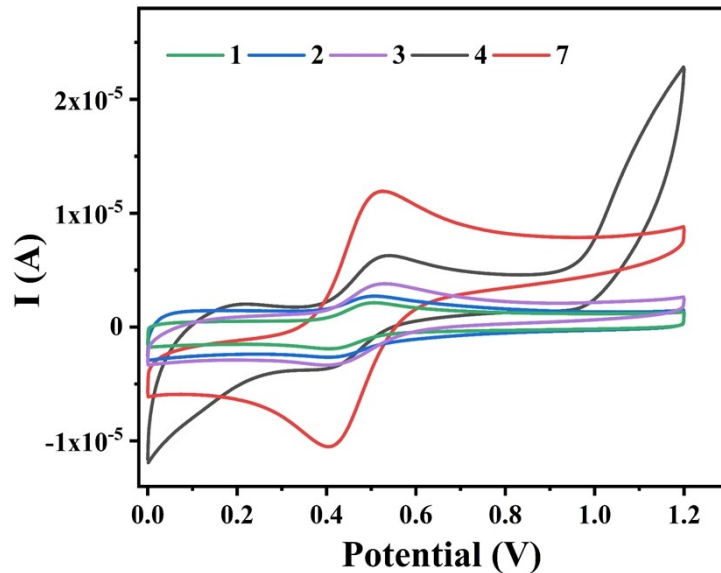

**Figure S19.** CV curves of **1** to **4** and **7** (20th cycle) on a cleaned FTO glass are shown.

## References

1. R. Gao, S. M. Chen, F. Wang and J. Zhang, Single-Crystal Syntheses and Properties of Indium-Organic Frameworks Based on 1,1'-Ferrocenedicarboxylic Acid, *Inorg Chem*, 2021, **60**, 239-245.

2. J. Benecke, S. Mangelsen, T. A. Engesser, T. Weyrich, J. Junge, N. Stock and H. Reinsch, A porous and redox active ferrocenedicarboxylic acid based aluminium MOF with a MIL-53 architecture, *Dalton Trans*, 2019, **48**, 16737-16743.
3. D. -J. Li, Q. -H. Li, Z. -R. Wang, Z. -Z. Ma, Z. -G. Gu and J. Zhang, Interpenetrated Metal-Porphyrinic Framework for Enhanced Nonlinear Optical Limiting, *J Am Chem Soc*, 2021, **143**, 17162-17169.
4. Q. -F. Chen, X. Zhao, Q. Liu, J. D. Jia, X. -T. Qiu, Y. L. Song, D. J. Young, W. H. Zhang and J. P. Lang, Tungsten(VI)-Copper(I)-Sulfur Cluster-Supported Metal-Organic Frameworks Bridged by in Situ Click-Formed Tetrazolate Ligands, *Inorg Chem*, 2017, **56**, 5669-5679.
